# Supplementary material for: Functional Characterisation of Germinant Receptors in Clostridium botulinum and Clostridium sporogenes Presents Novel Insights into Spore Germination Systems
Source: PubMed Central journal article supplement (PMC4161481; doi:10.1371/journal.ppat.1004382), 2014-09-11
Supplement: ppat.1004382.s003.pdf [file ppat.1004382.s003.pdf]

**Table S1. Effect of amino acid concentrations on clostridial spore germination.**

| Potential Germinants                                       | Germination | Minimum concentration tested at which germination occurs |
|------------------------------------------------------------|-------------|----------------------------------------------------------|
| L-alanine                                                  | +ve         | 0.5mM                                                    |
| L-cysteine                                                 | +ve         | 10mM                                                     |
| L-phenylalanine                                            | +ve         | 10mM                                                     |
| L-serine                                                   | +ve         | 10mM                                                     |
| L-methionine                                               | +ve         | 10mM                                                     |
| Glycine                                                    | +ve*        | 20mM                                                     |
| Inosine                                                    | -ve         | No germination at 100mM                                  |
| AGFK (L-asparagine, glucose, fructose, and potassium ions) | -ve         | No germination at 100mM                                  |
| L-asparagine                                               | -ve         | No germination at 100mM                                  |
| Nicotinamide                                               | -ve         | No germination at 100mM                                  |
| L-proline                                                  | -ve         | No germination at 100mM                                  |
| L-leucine                                                  | -ve         | No germination at 100mM                                  |
| L-isoleucine                                               | -ve         | No germination at 100mM                                  |
| L-arginine                                                 | -ve         | No germination at 100mM                                  |
| L-glutamine                                                | -ve         | No germination at 100mM                                  |
| L-aspartic acid                                            | -ve         | No germination at 100mM                                  |
| L-lysine                                                   | -ve         | No germination at 100mM                                  |
| L-valine                                                   | -ve         | No germination at 100mM                                  |

\* *C. botulinum* only, no germination detected in *C. sporogenes* at 100mM.

A selection of amino acids, were assessed for their individual effect on germination of spores of *C. botulinum* and *C. sporogenes* in the presence of Tris-HCl buffer (pH 7.4), L-lactate (50mM) and NaHCO<sub>3</sub> (50mM). Germination was determined by a decrease in optical density (OD) at 600nm using a Bioscreen C analyser and validated by phase-contrast microscopy.
