# Supplementary material for: Functional Characterisation of Germinant Receptors in Clostridium botulinum and Clostridium sporogenes Presents Novel Insights into Spore Germination Systems
Source: PubMed Central journal article supplement (PMC4161481; doi:10.1371/journal.ppat.1004382), 2014-09-11
Supplement: ppat.1004382.s004.pdf [file ppat.1004382.s004.pdf]

**Table S2. Primers used in this study**

| <b>Primers/function</b>      | <b>Sequence</b>                                |
|------------------------------|------------------------------------------------|
| <i>Southern Blot probe</i>   |                                                |
| Erm-F                        | 5'-CCGATACCGTTTACGAAATTGGAACAGG-3'             |
| Erm-R                        | 5'-TTATTTCTCCCGTTAAATAATAGATAACT-3'            |
| <i>Insert confirmation</i>   |                                                |
| CBO0123-F                    | 5'-GTTAATCGAGGGGGTATTACTATG-3'                 |
| CBO0123-R                    | 5'-GCTGAAGCTACTACGTCTGG-3'                     |
| CBO1975-F                    | 5'-GCCTGTTATCACCATAACTCAAAG-3'                 |
| CBO1975-R                    | 5'-GCGCCTATGAACTTAAAGGG-3'                     |
| CBO2797-F                    | 5'-CCTCATCTCATTCACTATCTTCTC-3'                 |
| CBO2797-R                    | 5'-GGCACAGGAAAGTATTGGCTAAA-3'                  |
| CLOSPO_03006-F               | 5'-GGGTAACTAATAACCAAGTCATAGATAGAG-3'           |
| CLOSPO_03006-R               | 5'-AAAAAACCATCCTATGGTAATGCCGAACATGCCTAA-3'     |
| CLOSPO_02140-F               | 5'-GTATTTAGAGATGTTTCTTGTAACAAGGAACCCTAC-3'     |
| CLOSPO_02140-R               | 5'-TATAACCATGGTAGATTGCGATGTTAAGCT-3'           |
| CLOSPO_02217-F               | 5'-ATTATGCTAGACAGGGGATTTATACAAAATGGATACG-3'    |
| CLOSPO_02217-R               | 5'-CTATCTCCATTACTGGACTGAAAGCAATCC-3'           |
| EBS universal                | 5'-CGAAATTAGAACTTGCGTTCAGTAAAC-3'              |
| ErmRAM-F                     | 5'-TATATTGATAAAAATAATAATAGTGGG-3'              |
| ErmRAM-R                     | 5'-GCGACTCATAGAATTATTTCTCCCG-3'                |
| <i>Receptor construction</i> |                                                |
| CLOSPO_02217-F               | 5'-ATCGTCTCACATGAGAGATAAATTAGATGA-3'           |
| CLOSPO_02219-R               | 5'-ATCGTCTCACATGTTAGAAAGTTCCTCTAACCC-3'        |
| CLOSPO_02217-F+              | 5'-ATCGTCTCACATGTAATTCTAGATATGGTAGAATGC-3'     |
| CLOSPO_00836-R               | 5'-ATCGTCTCACATGTTATTTTATTGCTCCTATTC-3'        |
| CLOSPO_00838-F               | 5'-ATCGTCTCACATGAAGGAAATAGTTAAGGA-3'           |
| CLOSPO_00839-F+              | 5'-ATCGTCTCACATGGGAAGAATAATAGGTAT-3'           |
| CLOSPO_03006-F               | 5'-ATCGTCTCACATGGTGTTTATGAGAAATAG-3'           |
| CLOSPO_03003-R               | 5'-ATCGTCTCACATGTTATGAATTAGGTTGGAGTA-3'        |
| CLOSPO_03006-F+              | 5'-ATCGTCTCACATGTTATTTTCATAAATTTACTA-3'        |
| CLOSPO_02140-F               | 5'-ATCGTCTCACATGTTAATATCTTCTAGCCTTATATGG-3'    |
| CLOSPO_02139-R               | 5'-ATCGTCTCACATGTTATGAAATAATATCAGCAC-3'        |
| CBO0123-F                    | 5'-ATCGTCTCACATGGTGTATAAGATGAAGGAAGTAG-3'      |
| CBO0125-R                    | 5'-ATCGTCTCACATGTTATTTTATTCCTCCTATTC-3'        |
| CBO0123-F+                   | 5'-ATCGTCTCACATGGGAAGAATAATAGGCATATTTG-3'      |
| CBO1974-F                    | 5'-ATCGTCTCACATGTTGAAAAAATTTGTTTAGG-3'         |
| CBO1978-R                    | 5'-ATCGTCTCACATGTTATGAATTAGATTGGAGTA-3'        |
| CBO1974-F+                   | 5'-ATCGTCTCACATGTATTTTAATAAACTTACTACATTATAC-3' |
| CBO02797-R                   | 5'-ATCGTCTCACATGTTAAAAGGTTCTCTGCCACCAC-3'      |
| CBO02795-F                   | 5'-ATCGTCTCACATGAGAGATAAGTTAGATAA-3'           |
| CBO02798-F+                  | 5'-ATCGTCTCACATGGTGTGCGCTATGCTAGACAGAGG-3'     |
| <i>Plasmid primers</i>       |                                                |
| Sbf-F                        | 5'-GCGCGTGATTGCCAAGCA-3'                       |
| Asc-R                        | 5'-TCTGTAAATTTCTTTCTATTCAGCACTGT-3'            |

+ denotes resulting product contains >500bp upstream of the named gene to be certain that a native promoter is included.
